# Supplementary material
Source: MDPI journal article supplement (https://www.mdpi.com/1999-4907/7/10/240)
Supplement: s1 [file s1]

Radial Growth Response of Black Spruce Stands Ten Years after Experimental Shelterwoods and Seed-Tree Cuttings in Boreal Forest

Miguel Montoro Girona, Hubert Morin, Jean-Martin Lussier and Denis Walsh

**Figure S1.** Schematic representation of experimental design. Stand structures (younger and older) are indicated as supra-variable in the design. The blocks are numbered (1 to 6), the experimental units are capital letters: control plots (A) and study treatments (B-C-D-E), the position classes of trees are lowercase letters: edge (e) or interior (i) and the quantity of tree samples by position class is indicated with the corresponding number.

**Table S1.** Average tree characteristics and species composition by silvicultural treatment for each stand structure before cutting (mean ± standard error).

| **Treatment/Structure** | ***N*** | **DBH (cm)** | | **Tree Height (m)** | | **Species Composition (%)** | | | | | |
| --- | --- | --- | --- | --- | --- | --- | --- | --- | --- | --- | --- |
| **Black Spruce** | | **Balsam Fir** | | **Others** | |
| **Control** |  |  |  |  |  |  |  |  |  |  |  |
| *-Younger* | 417 | 14.7 | ±1.4 | 16.3 | ±0.9 | 97.3 | ±1.3 | 0.7 | ±0.3 | 2.0 | ±1.0 |
| *-Older* | 229 | 15.6 | ±1.8 | 17.3 | ±0.9 | 98.7 | ±1.3 | 1.3 | ±1.3 | - | - |
| **Mini-strip** |  |  |  |  |  |  |  |  |  |  |  |
| *-Younger* | 424 | 13.8 | ±0.9 | 19.0 | ±1.1 | 93.0 | ±3.8 | 6.0 | ±3.8 | 1.0 | ±1.0 |
| *-Older* | 340 | 14.8 | ±0.4 | 17.0 | ±0.6 | 96.3 | ±2.7 | 3.7 | ±2.7 | - | - |
| **Distant selection** |  |  |  |  |  |  |  |  |  |  |  |
| *-Younger* | 521 | 13.3 | ±0.3 | 16.7 | ±0.9 | 96.5 | ±1.8 | 1.1 | ±0.6 | 2.4 | ±1.2 |
| *-Older* | 263 | 16.4 | ±0.6 | 18.0 | ±0.6 | 91.2 | ±3.8 | 7.1 | ±4.5 | 1.7 | ±1.0 |
| **Close selection** |  |  |  |  |  |  |  |  |  |  |  |
| *-Younger* | 503 | 14.7 | ±0.6 | 17.3 | ±0.3 | 92.4 | ±6.4 | 0.4 | ±0.3 | 7.2 | ±7.0 |
| *-Older* | 282 | 15.2 | ±0.1 | 17.7 | ±0.7 | 95.8 | ±2.3 | 4.2 | ±2.5 | - | - |
| **Seed-trees** |  |  |  |  |  |  |  |  |  |  |  |
| *-Younger* | 483 | 13.7 | ±1.0 | 15.7 | ±0.9 | 98.9 | ±0.9 | 1.1 | ±1.0 | - | - |
| *-Older* | 277 | 16.07 | ±0.1 | 18.0 | ±0.6 | 98.7 | ±1.3 | 1.3 | ±1.3 | - | - |
